# Supplementary material for: Median nerve block increases the success rate of radial artery cannulation in women with gestational hypertension undergoing cesarean section
Source: PubMed Central journal article supplement (PMC9354365; doi:10.1186/s12871-022-01793-4), 2022-08-05
Supplement: 12871_2022_1793_MOESM1_ESM.pdf [file 12871_2022_1793_MOESM1_ESM.pdf]

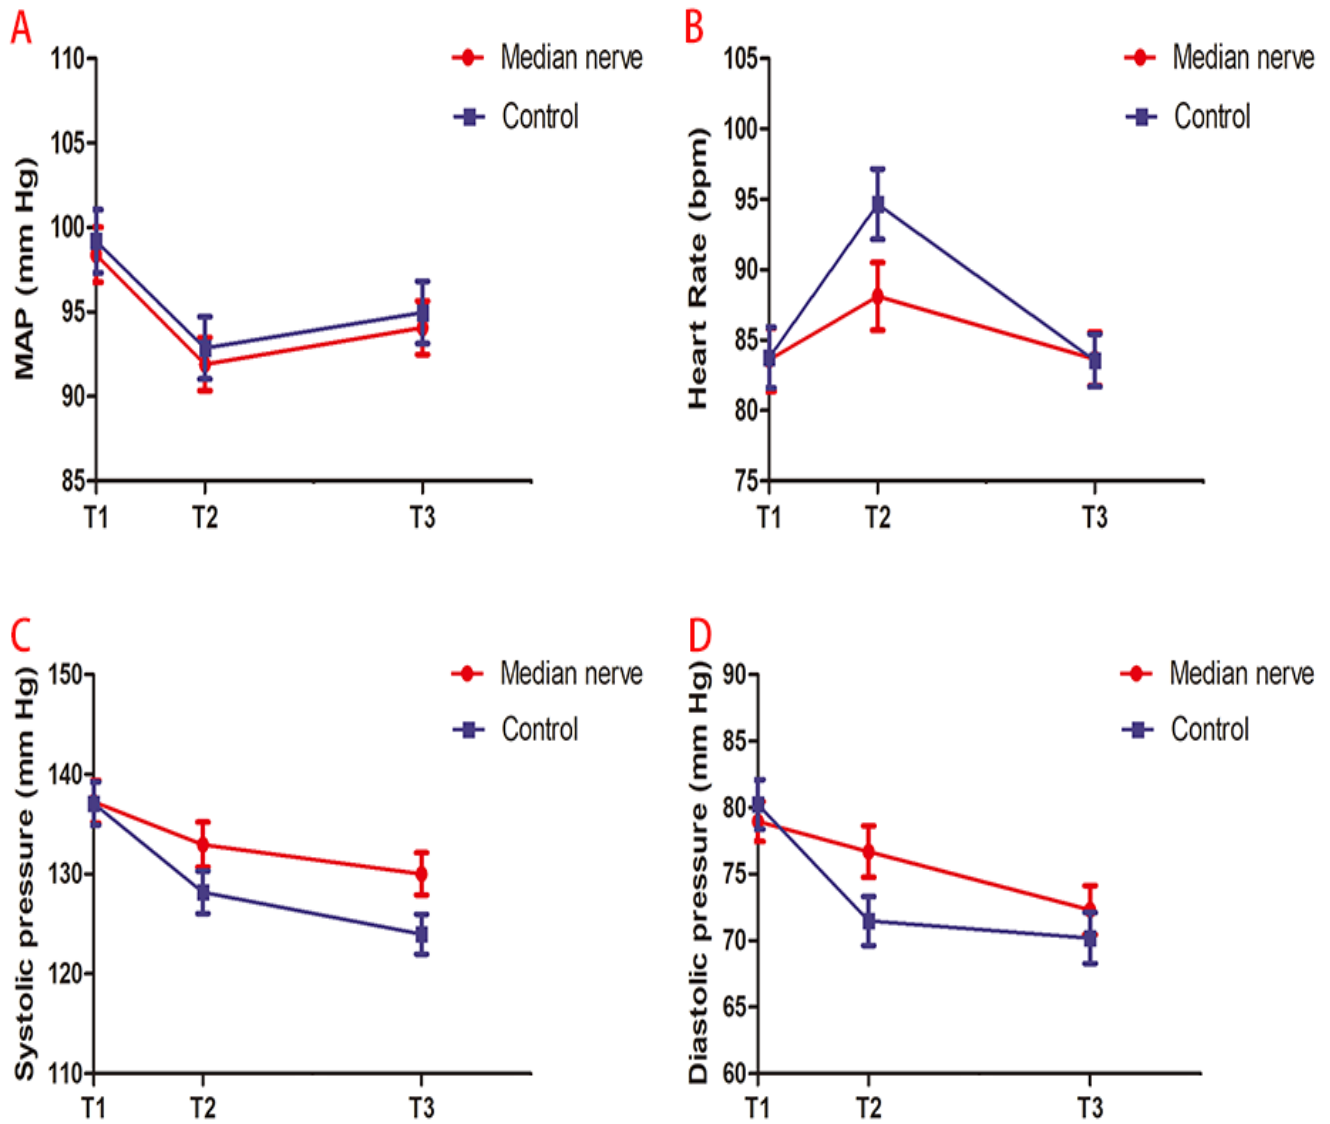

Supplemental Figure 1. Heart rate and Blood pressure. MAP= Mean arterial pressure. T1 = Baseline; T2 = 10 minutes after median nerve block or local anesthesia; T3 = 30 minutes after median nerve block or local anesthesia.
